# Supplementary figures and images for: Fitting Bayesian Models for Single-Case Experimental Designs
Source: Atypon-hosted journal article supplement (doi:10.1027/1614-2241/a000180), 2019-10-01

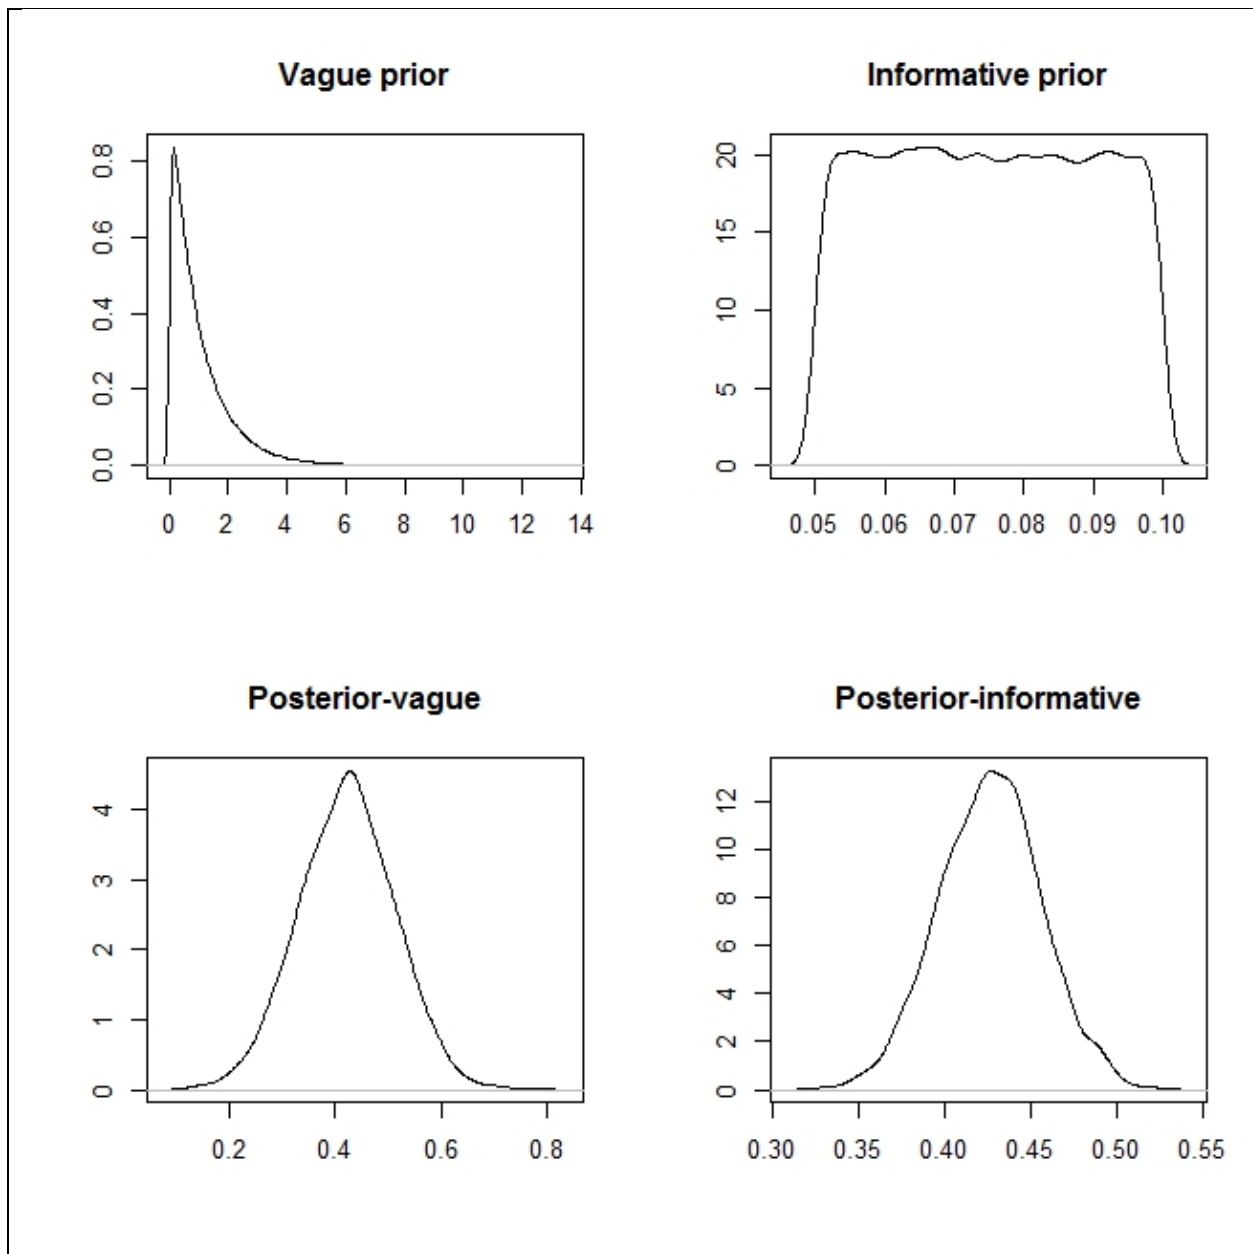

Figure 1E: Posteriors corresponding to vague and informative prior distributions

Supplement: 1614-2241_a000180_esm2.pdf [file 1614-2241_a000180_esm2.pdf]

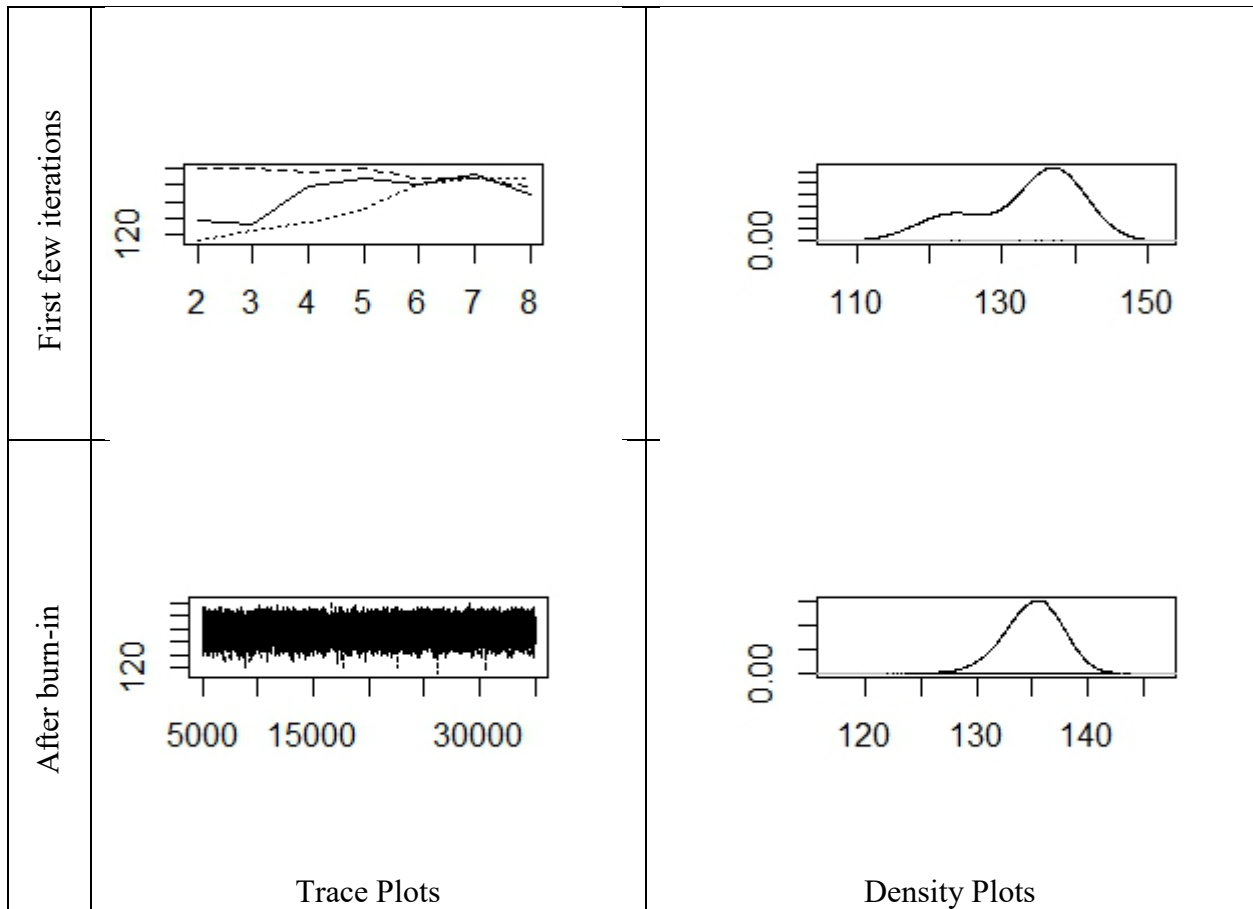

Figure 2E: Trace and Density Plots after 8, and 30,000 iterations and burn-in for three chains

Supplement: 1614-2241_a000180_esm3.pdf [file 1614-2241_a000180_esm3.pdf]
